## Changing the Laryngoscope Blade and Its Effect on Laryngeal Visualization

To the Editor:

Amour and colleagues compared single-use with reusable metal laryngoscope blades and found better laryngeal exposure and more successful intubation with the former.<sup>1</sup> Laryngeal visualization and subsequent tracheal intubation are dependent, however, on many other factors besides the blade type. Upper airway anatomy, experience of the laryngoscopist, adequate relaxation, patient's head and neck position, external laryngeal manipulation, blade size, and the laryngoscope lifting force are all factors that can dramatically affect the ability to visualize the larynx.<sup>2</sup> Therefore, to separate out the effect of one factor on laryngeal visualization, all of the other factors will have to be standardized. The authors should be applauded for trying to control most of the factors. Two important factors, however, were not addressed: the use of external laryngeal manipulation and the laryngoscope lifting force. There was no mention in the study of whether external laryngeal manipulation was used in some patients, all patients, or none; whether it was used during the first attempt, second attempt, both, or neither; and most importantly, whether the documented laryngoscopic grade was the one before or after its application, if it was applied. The use of external laryngeal manipulation can improve visualization by a whole grade and, in some patients, can be the factor that makes the difference between intubation failure and success.<sup>3</sup> Similarly, there was no mention of whether any attempt was made to standardize the laryngoscope lifting force. Increasing the force can be accompanied by a change in the resultant view, and this increase can occur in response to a poor view without the laryngoscopist even being aware of it.<sup>4</sup> The forces applied during laryngoscopy can be measured, and thus controlled, by a device that can be used for both clinical research and patient care purposes.<sup>5</sup> There is no doubt that the metal single-use blade provided better illumination, but was the difference in the results solely caused by the light factor or also influenced by the effect of the other factors that were not addressed? The results could have been more informative if these two factors were also standardized, especially because, as the authors themselves mentioned, it is extremely difficult to keep such a study blinded.

**Mohammad El-Orbany, M.D.,\* Christopher Plambeck, M.D., Mursel Antapli, M.D.** \*Department of Anesthesiology, Medical College of Wisconsin, Milwaukee, Wisconsin. [elorbany@mcw.edu](mailto:elorbany@mcw.edu)

### References

1. Amour J, Le Manach Y, Borel M, Lenfant F, Nicolas-Robin A, Carillion A, Ripart J, Riou B, Langeron O: Comparison of single-use and reusable metal laryngoscope blades for orotracheal intubation during rapid sequence induction of

anesthesia: A multicenter cluster randomized study. *ANESTHESIOLOGY* 2010; 112:325–32

2. Benumof JL: Difficult laryngoscopy: Obtaining the best view. *Can J Anesth* 1994; 41:361–5
3. Benumof JL, Cooper SD: Quantitative improvement in laryngoscopic view by optimal external laryngeal manipulation. *J Clin Anesthesia* 1996; 8:136–40
4. Hastings RH, Hon ED, Nghiem C, Wahrenbrock EA: Force and torque vary between laryngoscopists and laryngoscope blades. *Anesth Analg* 1996; 82:462–8
5. McCoy EP, Austin BA, Mirakhur RK, Wong KC: A new device for measuring and recording the forces applied during laryngoscopy. *Anaesthesia* 1995; 50:139–43

(Accepted for publication May 21, 2010.)

### In Reply:

We thank Dr. El-Orbany and colleagues for providing us the opportunity to clarify several points from our study.<sup>1</sup> As we clearly explained, “After muscle fasciculations had been observed to ensure adequate muscle relaxation, tracheal intubation was performed using an endotracheal tube systematically associated with an internal stylet and cricoid pressure (Sellick’s maneuver).”<sup>1,2</sup> Therefore, in all patients during the intubation procedure (both first and second attempts), cricoid pressure was applied and maintained. However, a recent randomized study using a reusable metal blade demonstrated that the Sellick maneuver does not significantly increase the rate of failed intubations.<sup>3</sup> In addition, as described in our study,<sup>1,2</sup> the Cormack and Lehane score was obviously evaluated during cricoid pressure in both first and second attempts.

Because two recent studies demonstrated that peak force was not significantly different between single-use and reusable metal blades for tracheal intubation,<sup>4,5</sup> and because force assessment markedly increases the complexity of the procedure and may influence the efficiency of an anesthesiologist in the specific case of patients undergoing general anesthesia requiring rapid sequence induction, the lifting force was not measured in our study. Moreover, Rassam *et al.*<sup>5</sup> observed that the grade of anesthetists (trainee or consultant) did not significantly affect the mean peak force applied during laryngoscopy. We confirmed these findings because intubation performances were similar between senior anesthesiologists, junior anesthesiologists, and nurse anesthetists recruited to participate in this multicenter randomized study. Finally, as reported in Hastings’ study,<sup>6</sup> lifting force is not significantly different among repeated laryngoscopies performed by the same anesthesiologist. In our study, first and second attempts were performed by the same operator. For all these reasons, we do not think that lifting force may have contributed to bias the results obtained in our study.

**Julien Amour, M.D., Ph.D.,\* Bruno Riou, M.D., Ph.D.**

\*Université Pierre et Marie Curie Univ Paris 06, Groupe Hospitalier Pitié-Salpêtrière, Assistance Publique-Hôpitaux de Paris, Paris, France. julien.amour@psl.aphp.fr

## References

1. Amour J, Le Manach YL, Borel M, Lenfant F, Nicolas-Robin A, Carillion A, Ripart J, Riou B, Langeron O: Comparison of single-use and reusable metal laryngoscope blades for orotracheal intubation during rapid sequence induction of anesthesia: A multicenter cluster randomized study. *ANESTHESIOLOGY* 2010; 112:325-32
2. Amour J, Marmion F, Birenbaum A, Nicolas-Robin A, Coriat P, Riou B, Langeron O: Comparison of plastic single-use and metal reusable laryngoscope blades for orotracheal intubation during rapid sequence induction of anesthesia. *ANESTHESIOLOGY* 2006; 104:60-4
3. Turgeon AF, Nicole PC, Trépanier CA, Marcoux S, Lessard MR: Cricoid pressure does not increase the rate of failed intubation by direct laryngoscopy in adults. *ANESTHESIOLOGY* 2005; 102:315-9
4. Evans A, Vaughan RS, Hall JE, Mecklenburgh J, Wilkes AR: A comparison of the forces exerted during laryngoscopy using disposable and non-disposable laryngoscope blades. *Anaesthesia* 2003; 58:869-73
5. Rassam S, Wilkes AR, Hall JE, Mecklenburgh JS: A comparison of 20 laryngoscope blades using an intubating manikin: Visual analogue scores and forces exerted during laryngoscopy. *Anaesthesia* 2005; 60:384-94
6. Hastings RH, Hon ED, Nghiem C, Wahrenbrock EA: Force and torque vary between laryngoscopists and laryngoscope blades. *Anesth Analg* 1996; 82:462-8

(Accepted for publication May 21, 2010.)

## Conflicts of Interest in Expert-authored Practice Parameters, Standards, Guidelines, Recommendations

### To the Editor:

Butterworth and Rathmell<sup>1</sup> correctly point out that not all groups are appropriately constituted or have “proper standing” to produce credible “consensus statements, guidelines, and parameters.” They state that “it seems obvious that small groups funded either directly or indirectly by pharmaceutical companies (even when the money has been “laundered” through a medical education company) lack standing. . . .”

I have participated in committees of the American Society of Anesthesiologists (ASA) and other “appropriate medical societies” that have produced practice parameters and standards, as well as groups of highly qualified experts funded in the manner decried by Butterworth and Rathmell. It is pos-

sible for an expert panel, through a medical education company, to build a sufficient barrier from the funding agency to conduct their process without influence of a pharmaceutical company that may have provided an unrestricted educational grant.<sup>2</sup> “Appropriate” medical societies do not have a monopoly on exceptional knowledge, opinion, or judgment.

The implication, by the use of the term “money... laundering,” that an expert group convened by a medical education company is conducting an illicit or intentionally deceptive activity<sup>3</sup> is inappropriate and misguided. I assume that Butterworth and Rathmell are concerned about conflict of interest. Although that is an appropriate and important concern, we should recognize that, in one way or another, we all have such conflicts. Some may be directly financial; others may be more subtle, but nevertheless, of at least equal importance and impact.

The ASA, with the guidance of James F. Arens, M.D., has done a remarkable job and provided an extraordinary service in producing a number of such documents. The formal process of the ASA for expert-authored guidelines and parameters requires approval by the Society’s House of Delegates.

However, the origins of this approval process were not necessarily altruistic and without fiscal motivation.<sup>4</sup> Interestingly, the ASA does not publish information regarding the conflicts of interest that may exist for their experts, consultants, and reviewers. Similarly, we do not know of the conflicts of the members of the House of Delegates who must approve each document—and notably, the House rejected one such document.<sup>5</sup>

Such conflicts may not be trivial. For example, take the practice guidelines for pulmonary artery catheterization<sup>6,7</sup> and perioperative transesophageal echocardiography.<sup>8,9</sup> Do we know whether any of those involved (or members of their families) in the construction or approval of the guideline had a financial interest in any firm manufacturing or selling the catheters, probes, or devices required for their use? Do we know how many of these individuals billed separately for the procedures?

The ASA and some component societies have apparently voiced a negative opinion of proposals limiting the ability of physicians to bill separately for such services.<sup>10</sup> I do not mean to imply any dishonesty or impropriety of those involved; nor am I addressing the issue of billing *per se*, but rather I am noting the potential for the appearance of a conflict of interest.

Note, in contrast, the full disclosure of the authors of a recent recommendation regarding otitis media produced by an international group of experts whose meeting expenses were funded by an unrestricted educational grant from a pharmaceutical firm through a medical education company.<sup>2</sup>

Aside from the issue of direct financial conflicts, other conflicts are possible. Does not a certain increased standing and respect among one’s colleagues accrue from having participated in expert panels? May such participation not lead to other activities—such as lectures, visiting professorships, and so forth—all of which may add to one’s status at an academic institution and assist with promotion possibilities along with the associated increase in standing and salary?

Support was provided from institutional and/or departmental sources. The author is also supported by Grant 1 P50 HL54476 from the National Institutes of Health, Bethesda, MD.

The author has served on committees of medical societies writing guidelines and standards. He has also consulted for a medical education company that has facilitated the writing of consensus statements. The funding agency had no role in this letter.
